# Supplementary material
Source: publisher site journal article supplement (https://static.cambridge.org/content/id/urn:cambridge.org:id:article:S0899823X19000485/resource/name/S0899823X19000485supp001.docx)
Supplement: Supplementary file 1 [file S0899823X19000485supp001.docx]

**APPENDIX I- Systematic Review Search Strategies**

Final search run on 06/13/2017

Total references on 06/13/2017: 2989 references

Total following de-duplication: 2639 references

**Inclusion/Exclusion Criteria**

- To be eligible for inclusion, the study had to report an infection control outcome in the healthcare setting and had to employ a CRT design.
- No publication date limit.
- The search identified terms in the title, abstract and key words fields.
- Articles with titles and abstracts in English but without full text available in English or French were excluded.
- The most common reasons for exclusion included:

1) The study setting was not healthcare (i.e. daycare);

2) Randomization was not at the cluster level (randomized individual patients or healthcare workers);

3) The primary outcome was not directly related to hospital infection prevention and control (i.e. general infectious disease outcomes) and;

4) The article did not present original research (i.e. commentaries, trial protocols, conference abstracts, guidelines)

**Ovid MEDLINE** 1290referenceson 6/13/2017

(Cluster Analysis/or Randomized Controlled Trials as Topic/ OR Cross-Over Studies/ OR Cluster randomized trial.mp OR Stepped wedge.mp) **AND**

(Infection Control OR Hospital epidemiology.mp OR Nosocomial infection.mp or Cross Infection/ OR Antimicrobial stewardship.mp)

**Embase** 710 references on 06/13/2017

(“cluster analysis”:de,ab,ti OR “randomized controlled trial (topic)”/de OR “randomized control* trial*”:de,ab,ti OR “cross-over stud*”:ab,ti OR “crossover procedure”/de OR “cluster randomized trial*”:ab,ti OR “stepped wedge”:ab,ti) **AND**

(“infection control”:de,ab,ti OR “hospital epidemiology”:ab,ti OR “hospital acquired infection*”:ab,ti OR “nosocomial infection*”:ab,ti OR “hospital infection”/de OR “cross infection”/de OR “antimicrobial stewardship”:ab,ti) **AND**

([embase]/lim NOT [medline]/lim)

**CENTRAL** 989 references on 06/13/2017 – *title, abstract, keywords*

(“cluster analysis” OR “randomized control* trial*” OR “cross-over stud*” OR “cluster randomized trial*” OR “stepped wedge”) **AND**

(“infection control” OR “hospital epidemiology” OR “hospital acquired infection*” OR “nosocomial infection*” OR “cross infection*” OR “antimicrobial stewardship”)
